# Supplementary material for: Type 2 diabetes mellitus and risk of community-acquired pneumonia: a systematic review and meta-analysis of observational studies
Source: PubMed Central journal article supplement — CMAJ Open. 2021 Jan 25;9(1):E62–70. doi: 10.9778/cmajo.20200013 (PMC7843079; doi:10.9778/cmajo.20200013), 2021-01-25
Supplement: supp_9.1.E62_2020-0013-1-at.pdf [file supp_9.1.E62_2020-0013-1-at.pdf]

## Appendix 1 (as supplied by the authors)

**Table S1:** Search strategy for observational studies of type 2 diabetes and the risk of community-acquired pneumonia – MEDLINE.

| Table 1: search strategy in MEDLINE |                                                                                  |
|-------------------------------------|----------------------------------------------------------------------------------|
| Search number                       | Search terms                                                                     |
| 1                                   | exp Diabetes mellitus, Type 2/ (132680)                                          |
| 2                                   | type 2 diabet*.mp. (134567)                                                      |
| 3                                   | type two diabet*.mp. (184)                                                       |
| 4                                   | Diabetes Mellitus/ (117098)                                                      |
| 6                                   | diabet*.mp. (695862)                                                             |
| 6                                   | insulin resistance/ (56764)                                                      |
| 7                                   | insulin resist*.mp. (98773)                                                      |
| 8                                   | glyc?emic control*.mp. (33034)                                                   |
| 9                                   | non insulin dependent diabet*.mp (10036)                                         |
| 10                                  | t2dm.ti, ab, kw. (20698)                                                         |
| 11                                  | hypoglycemia/ (27321)                                                            |
| 12                                  | hypoglyc?emia.mp. (48884)                                                        |
| 13                                  | hyperglycemia/ (27918)                                                           |
| 14                                  | hyperglyc?emia.mp. (64499)                                                       |
| 15                                  | exp PNEUMONIA/ (102059)                                                          |
| 16                                  | community acquired pneumonia.mp. (9902)                                          |
| 17                                  | respiratory tract infections/ (38391)                                            |
| 18                                  | Community-Acquired Infections/ (14167)                                           |
| 19                                  | 1 or 2 or 3 or 4 or 5 or 6 or 7 or 8 or 9 or 10 or 11 or 12 or 13 or 14 (342105) |

|    |                               |
|----|-------------------------------|
| 20 | 15 or 16 or 17 or 18 (785273) |
| 21 | 19 and 20 (1763)              |

**Table S2:** Exposure and outcome definitions of included studies of association between type 2 diabetes and community-acquired pneumonia.

| Author, year          | Exposure        | Exposure definition                                                                                                              | Primary Outcome                              | Outcome definition                                                                                                                |
|-----------------------|-----------------|----------------------------------------------------------------------------------------------------------------------------------|----------------------------------------------|-----------------------------------------------------------------------------------------------------------------------------------|
| <b>Cohort studies</b> |                 |                                                                                                                                  |                                              |                                                                                                                                   |
| Jackson, 2004         | Diabetes        | Any inclusion in the Group Health Cooperative diabetes registry                                                                  | Community-acquired pneumonia hospitalization | International classification for disease 9 clinical modification (ICD-9-CM) codes: 480 – 487.0, 038.0, 038.2, 041.0, 041.2, 320.1 |
| Muller, 2005          | Type 2 diabetes | International classification primary care (ICPC) code DM1 (T90.1) or DM2 (T90.2)                                                 | Pneumonia                                    | ICPC code: pneumonia (R81)                                                                                                        |
| O’Meara, 2005         | Diabetes        | Diabetes mellitus at baseline from fasting plasma glucose of at least 126mg/dL or the use of insulin or oral hypoglycemic agents | Pneumonia hospitalization                    | ICD-9-CM codes: 481.482, 486                                                                                                      |
| Benfield, 2007        | Diabetes        | Self-reported                                                                                                                    | Pneumonia hospitalization                    | International classification for disease 8 (ICD-8) code : 480 – 486<br>ICD-10 codes : A48.1, J12 – J18                            |
| Ehrlich, 2010         | Diabetes        | Inclusion in the KPNC diabetes registry according to 1) pharmacy prescriptions                                                   | Pneumonia hospitalization                    | ICD-9 codes: 480-486                                                                                                              |

| Author, year        | Exposure        | Exposure definition                                                                                                                                                  | Primary Outcome           | Outcome definition                                                                                                                                                                                                                         |
|---------------------|-----------------|----------------------------------------------------------------------------------------------------------------------------------------------------------------------|---------------------------|--------------------------------------------------------------------------------------------------------------------------------------------------------------------------------------------------------------------------------------------|
|                     |                 | for antidiabetic agents, 2) abnormal A1c values, primary or secondary hospital discharge of diabetes and 4) emergency department visits with a diagnosis of diabetes |                           |                                                                                                                                                                                                                                            |
| Hamilton, 2013      | Type 2 diabetes | Fasting plasma glucose (>7.8 mmol/l until 1999 and >7.0 mmol/l thereafter) urine samples                                                                             | Pneumonia hospitalization | ICD-9-clinical modification (CM) code :480.1, 480.2 480.8, 480.9, 481, 482.0–.9, 483.0, 485, 486<br>ICD-10 codes: J12.1, J12.2, J12.8, J12.9, J13, J14, J15.0, J15.1, J15.3, J15.4, J15.5, J15.6, J15.7, J15.8, J15.9, J18.0, J18.8, J18.9 |
| Seminog LHES, 2013  | Diabetes        | ICD-7 code: 260,<br>ICD-8 code: 250<br>ICD-9 code: 250<br>ICD-10 codes: E10–E14                                                                                      | Pneumonia                 | ICD-10 codes J13, pneumonia specified as <i>S. pneumoniae</i> ; A40.3, septicaemia attributable to <i>S. pneumoniae</i> ; and G00.1                                                                                                        |
| Seminog ORLS1, 2013 | Diabetes        | Idem                                                                                                                                                                 | Pneumonia                 | Idem                                                                                                                                                                                                                                       |

| <b>Author, year</b>         | <b>Exposure</b> | <b>Exposure definition</b>                                                                               | <b>Primary Outcome</b>                       | <b>Outcome definition</b>                                                                                                                                                    |
|-----------------------------|-----------------|----------------------------------------------------------------------------------------------------------|----------------------------------------------|------------------------------------------------------------------------------------------------------------------------------------------------------------------------------|
| Seminog ORLS2, 2013         | Diabetes        | Idem                                                                                                     | Pneumonia                                    | Idem                                                                                                                                                                         |
| Hine, 2017                  | Type 2 diabetes | Diagnostic, biochemical and prescription data entered before January 1 2014 (cohort entry)               | Pneumonia                                    | read code H20-28                                                                                                                                                             |
| Lopez de Andres, 2017       | Type 2 diabetes | ICD-9-CM codes: 250.x0, 250.x2                                                                           | Community-acquired pneumonia hospitalization | ICD-9-CM codes: 480–488, 507.0– 507.8                                                                                                                                        |
| Ray, 2017                   | Diabetes        | The presence of diabetes mellitus in clinical notes                                                      | Pneumonia                                    | medical record review of culture results                                                                                                                                     |
| Williams, 2017              | Diabetes        | Read codes for diabetes at baseline                                                                      | Community-acquired pneumonia                 | ICD-10 codes (not further specified)                                                                                                                                         |
| <b>Case-control studies</b> |                 |                                                                                                          |                                              |                                                                                                                                                                              |
| Farr, 2000                  | Diabetes        | Self-reported                                                                                            | Pneumonia                                    | Acute lower respiratory tract infection for which an antibiotic was prescribed associated with new focal signs on chest examination and new radiographic pulmonary shadowing |
| Thomsen, 2004               | Type-2 diabetes | Previous hospitalization with diabetes or earlier prescriptions for insulin or an oral antidiabetic drug | Community-acquired pneumonia                 | Patients older than 15 years with a first hospitalization for community-acquired                                                                                             |

| <b>Author, year</b> | <b>Exposure</b> | <b>Exposure definition</b>                                                                   | <b>Primary Outcome</b>                       | <b>Outcome definition</b>                                                                                                                                                                                                        |
|---------------------|-----------------|----------------------------------------------------------------------------------------------|----------------------------------------------|----------------------------------------------------------------------------------------------------------------------------------------------------------------------------------------------------------------------------------|
|                     |                 |                                                                                              |                                              | pneumococcal bacteremia                                                                                                                                                                                                          |
| Van de Garde, 2006  | Diabetes        | Recorded use of oral antidiabetic agents and/or insulin                                      | Community-acquired pneumonia hospitalization | Primary discharge diagnosis: ICD-9-CM codes: 481, 482, 485, 486 or Patients with a signature of bacterial pneumonia (secondary discharge diagnosis) coupled with a primary pulmonary diagnosis<br>ICD-9-CM codes: 491–493 or 496 |
| Kornum, 2008        | Type 2 diabetes | ICD-8 codes: 249– 250<br>ICD-10 codes: E10–E14 , O24 (diabetes in pregnancy except for O24.4 | Pneumonia hospitalization                    | ICD-10 codes: J12.x – J18.x<br>ICD-8 codes: not mentioned                                                                                                                                                                        |

Abbreviations: KPNC: Kaiser Permanente Medical Care Program in Northern California, LHES=Linked English Hospital Statistics, ORLS=Oxford Record Linkage Study

**Table S3:** Quality assessment of studies examining the association between type 2 diabetes and risk of community-acquired pneumonia.

| Study                 | Outcome                                      | Confounding | Selection of participants into the study | Classification of interventions | Deviations from intended intervention | Missing data | Measurement of outcomes | Reported result | Overall |
|-----------------------|----------------------------------------------|-------------|------------------------------------------|---------------------------------|---------------------------------------|--------------|-------------------------|-----------------|---------|
| <b>Cohort study</b>   |                                              |             |                                          |                                 |                                       |              |                         |                 |         |
| Jackson, 2004         | Community-acquired pneumonia hospitalization | Serious     | Low                                      | Low                             | Serious                               | Moderate     | Moderate                | Moderate        | Serious |
| Muller, 2005          | Infections including Pneumonia               | Serious     | Serious                                  | Low                             | Serious                               | Low          | Serious                 | Serious         | Serious |
| O'Meara, 2005         | Pneumonia hospitalization                    | Serious     | Low                                      | Moderate                        | Low                                   | Low          | Moderate                | Moderate        | Serious |
| Benfield, 2007        | Pneumonia related death                      | Serious     | Moderate                                 | Low                             | Low                                   | Low          | Serious                 | Serious         | Serious |
| Ehrlich, 2010         | Pneumonia                                    | Serious     | Moderate                                 | Moderate                        | Low                                   | Moderate     | Moderate                | Moderate        | Serious |
| Hamilton, 2013        | Pneumonia                                    | Serious     | Serious                                  | Moderate                        | Low                                   | Low          | Serious                 | Moderate        | Serious |
| Seminog, 2013         | Pneumonia                                    | Serious     | Moderate                                 | Low                             | Low                                   | Low          | Serious                 | Moderate        | Serious |
| Hine, 2017            | Pneumonia                                    | Serious     | Moderate                                 | Low                             | Low                                   | Moderate     | Serious                 | Serious         | Serious |
| Lopez-de-Andres, 2017 | Community-acquired pneumonia hospitalization | Serious     | Low                                      | Low                             | Low                                   | Moderate     | Low                     | Moderate        | Serious |
| Ray, 2017             | Pneumonia                                    | Serious     | Moderate                                 | Low                             | Serious                               | Serious      | Serious                 | Serious         | Serious |

|                           |                              |         |          |          |     |          |          |          |         |
|---------------------------|------------------------------|---------|----------|----------|-----|----------|----------|----------|---------|
| Williams, 2017            | Community-acquired pneumonia | Serious | Serious  | Low      | Low | Low      | Low      | Moderate | Serious |
| <b>Case-control study</b> |                              |         |          |          |     |          |          |          |         |
| Farr, 2000                | Pneumonia                    | Serious | Moderate | Moderate | Low | Moderate | Low      | Moderate | Serious |
| Thomsen, 2004             | Hospitalization for CAP      | Serious | Serious  | Low      | Low | Serious  | Serious  | Serious  | Serious |
| van de Garde, 2006        | Community-acquired pneumonia | Serious | Moderate | Low      | Low | Low      | Low      | Moderate | Serious |
| Kornum, 2008              | Pneumonia Hospitalization    | Serious | Low      | Low      | Low | Low      | Moderate | Moderate | Serious |



**Figure S1:** Forest plot of association between type 2 diabetes and risk of community-acquired pneumonia by exposure definition.

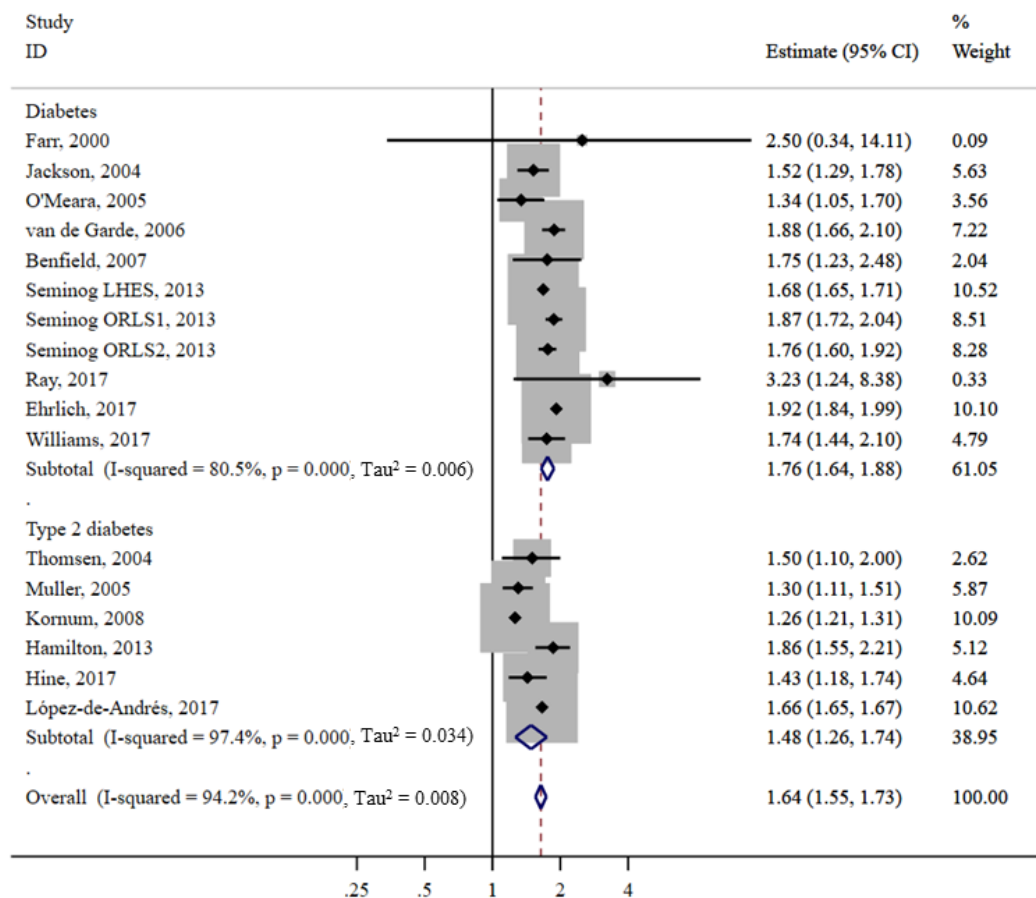

Abbreviations: LHES=Linked English Hospital, ORLS=Oxford Record Linkage Study.

The 95% prediction intervals were 1.43, 2.17 for studies of diabetes in general and 0.90, 2.42 for studies of type 2 diabetes.

**Figure S2:** Forest plot of association between type 2 diabetes and risk of community-acquired pneumonia by outcome definition.

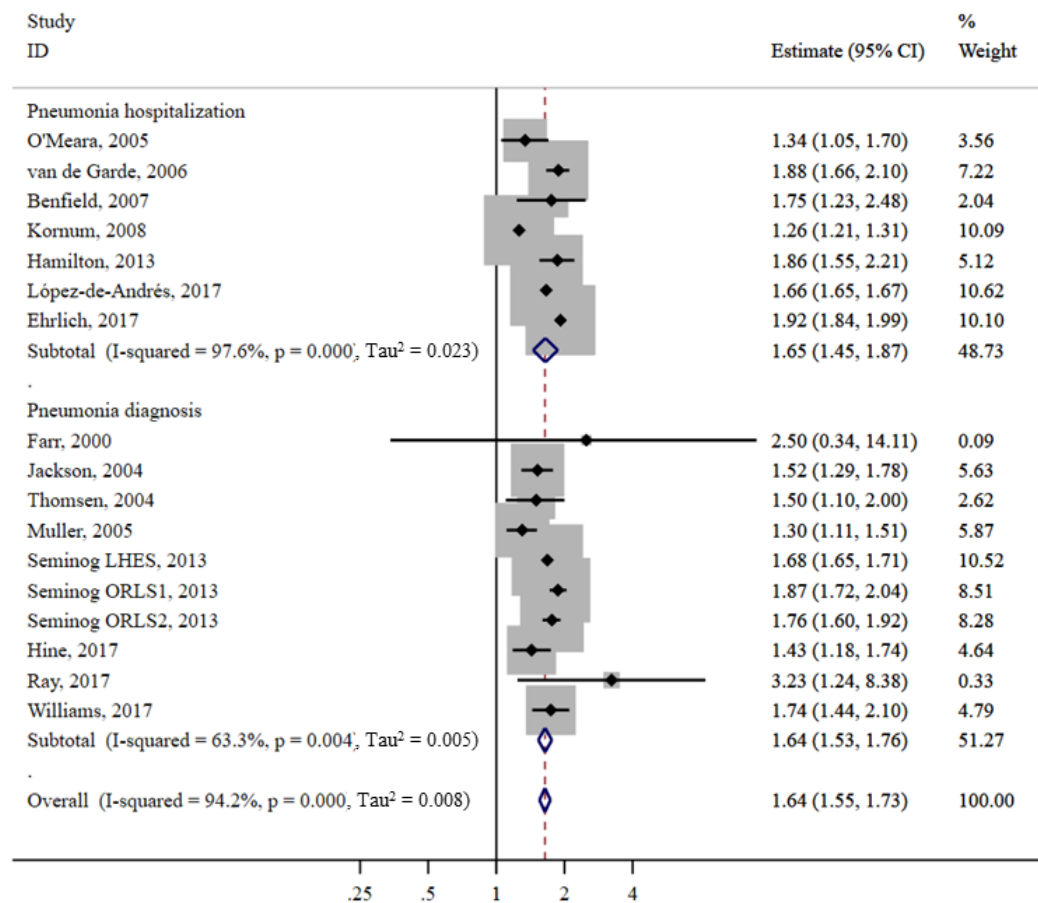

Abbreviations: LHES=Linked English Hospital, ORLS=Oxford Record Linkage Study The 95% prediction intervals were 1.10, 2.47 for studies with the outcome defined by pneumonia hospitalization and 1.34, 2.00 for studies with the outcome defined by a diagnosis of pneumonia.



**Figure S3:** Forest plot of association between type 2 diabetes and risk of community-acquired pneumonia using fixed-effects model.

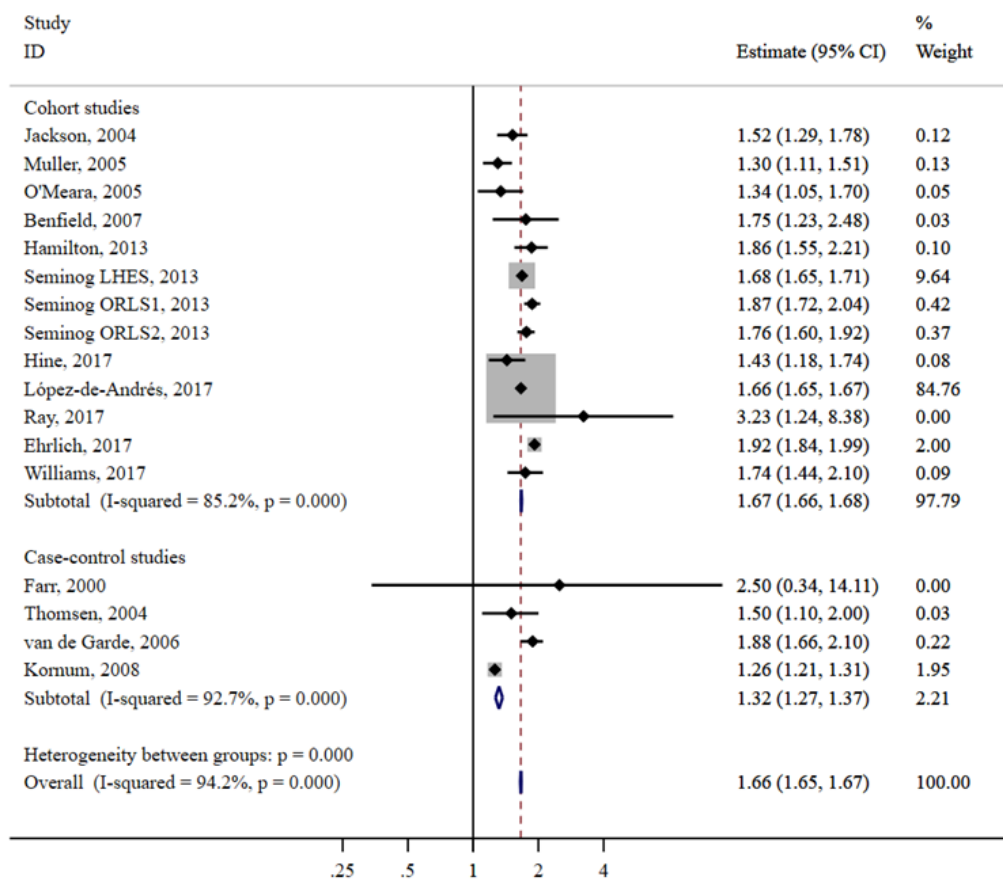

Abbreviations: LHES=Linked English Hospital, ORLS=Oxford Record Linkage Study

**Figure S4: Influence analysis**

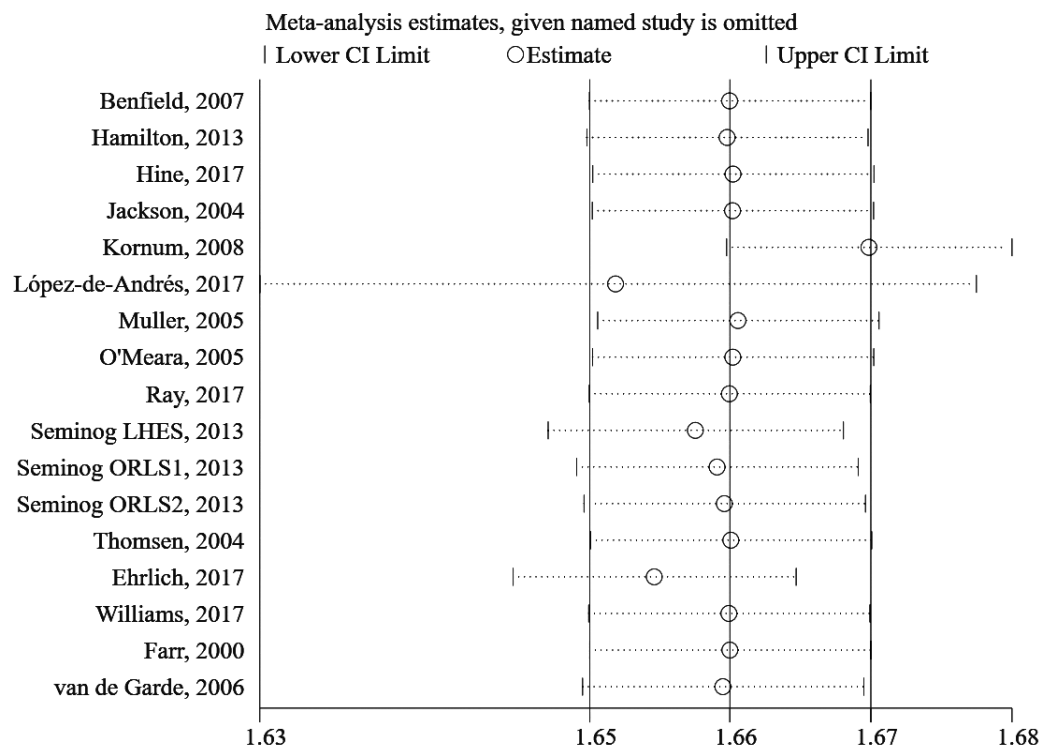

Abbreviations: CI= confidence interval, LHES=Linked English Hospital, ORLS=Oxford Record Linkage Study

**Figure S5:** Forest plot of association between type 2 diabetes and risk of community-acquired pneumonia excluding study by Kornum et al. (2008).

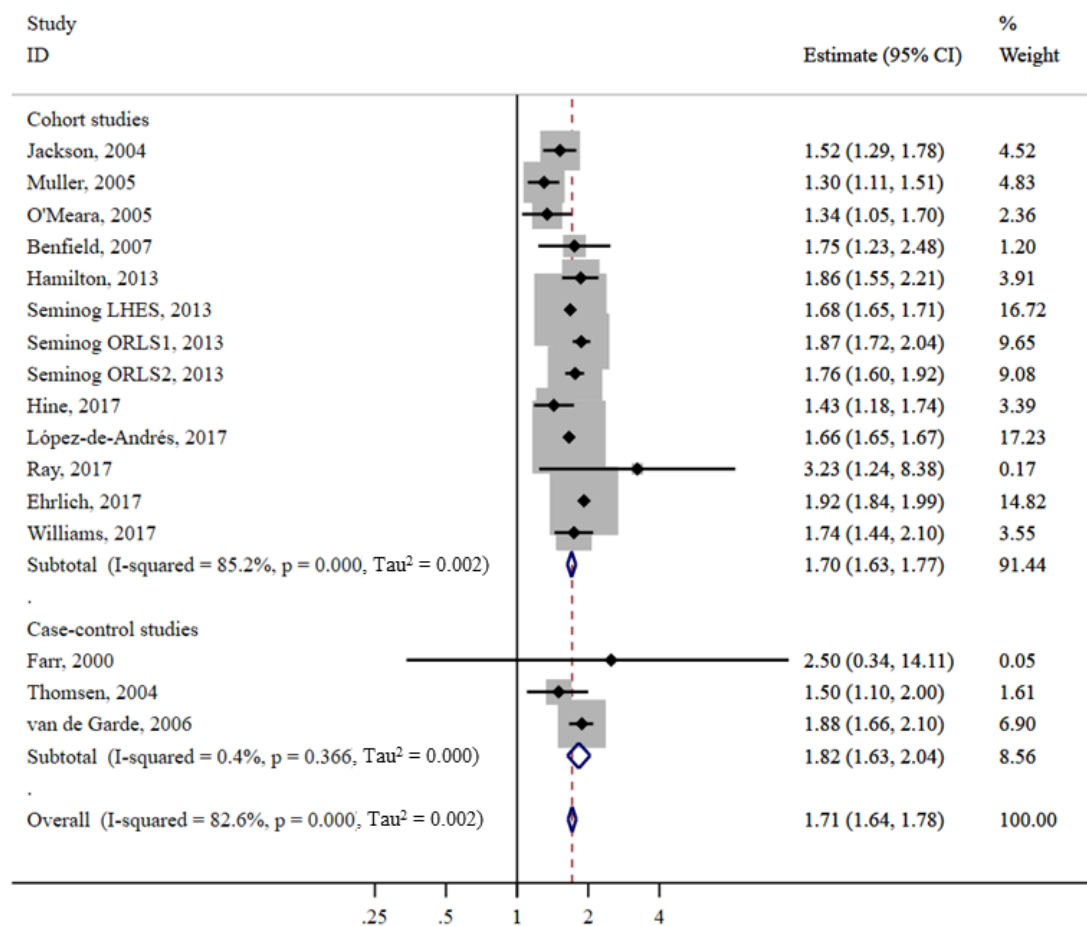

Abbreviations: LHES=Linked English Hospital, ORLS=Oxford Record Linkage Study

The 95% prediction intervals were 1.51, 1.92 for cohort studies, 1.59, 2.11 for case-control studies, and 1.51, 1.93 overall.

**Figure S6:** Funnel plot for assessment of small-study effects (publication bias) of included studies on type 2 diabetes and community-acquired pneumonia.

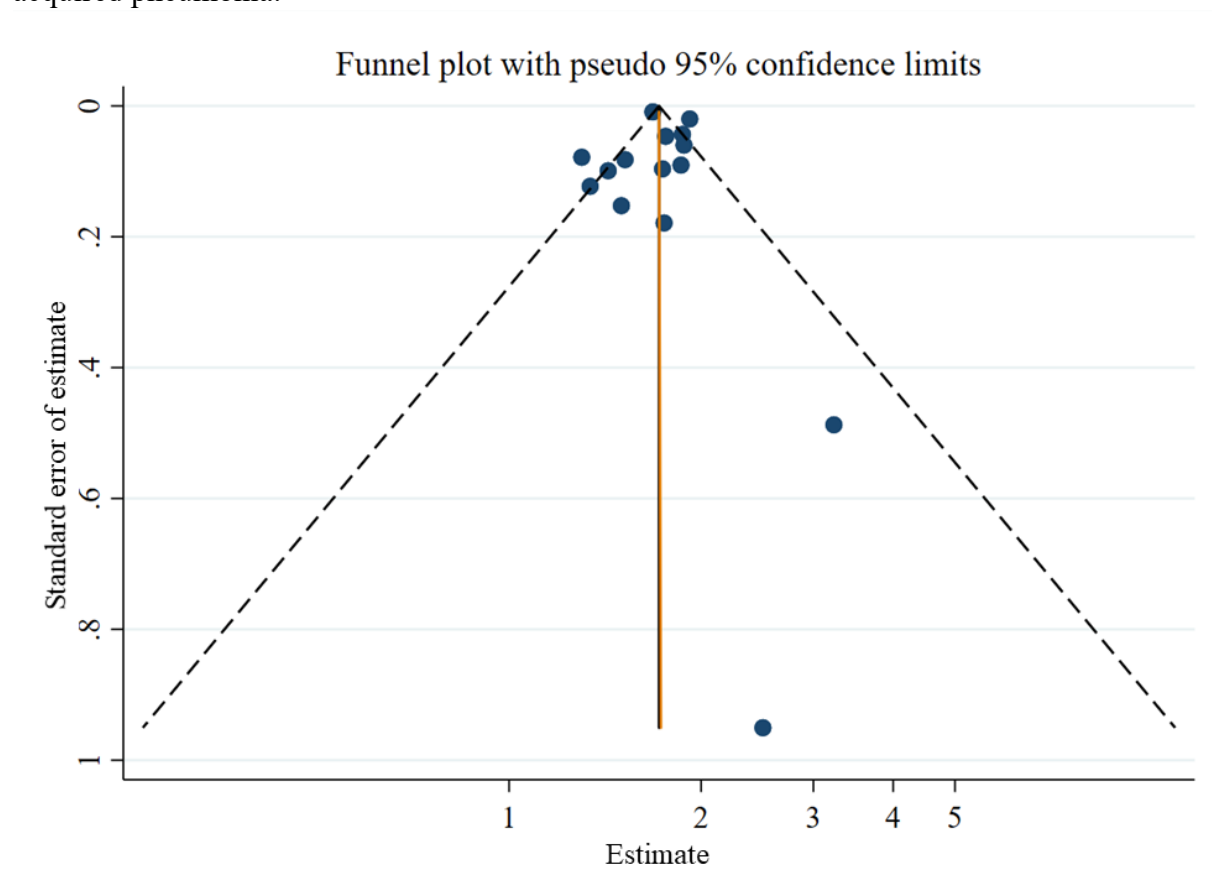

**Table S4:** Sensitivity analysis converting odds ratios to risk ratios using the approach described by the Cochrane collaboration. <sup>1</sup>

| <b>Author, Year</b> | <b>Reported OR (95% CI)</b> | <b>Calculated RR (95% CI)</b> |
|---------------------|-----------------------------|-------------------------------|
| Farr, 2000          | 2.50 (0.34, 14.11)          | 2.10 (0.32, 10.82)            |
| Thomsen, 2004       | 1.50 (1.1, 2.00)            | 1.44 (1.09, 1.84)             |
| Muller, 2005        | 1.30 (1.11, 1.52)           | 1.29 (1.10, 1.51)             |
| van de Garde, 2006  | 1.88 (1.66, 2.10)           | 1.85 (1.64, 2.01)             |
| Kornum, 2008        | 1.26 (1.21, 1.31)           | 1.23 (1.19, 1.27)             |
| Hine, 2017          | 1.43 (1.18, 1.74)           | 1.42 (1.18, 1.74)             |
| Ray, 2017           | 3.23 (1.24, 8.38)           | 2.91 (1.23, 6.10)             |
| Williams, 2017      | 1.74 (1.44, 2.10)           | 1.71 (1.40, 1.95)             |

Abbreviations: CI= confidence interval, OR=odds ratio, RR=relative risk

References:

- 1) Deeks JJ, H.J., Altman DG, Chapter 10: Analysing data and undertaking meta-analyses., in Cochrane Handbook for Systematic Reviews of Interventions version 6.0 T.J. Higgins JPT, Chandler J, Cumpston M, Li T, Page MJ, Welch VA, Editor. 2019, Cochrane
- 2) Grant, R.L., Converting an odds ratio to a range of plausible relative risks for better communication of research findings. *BMJ : British Medical Journal*, 2014. 348: p. f7450.



**Figure S7:** Forest plot of association between type 2 diabetes and risk of community-acquired pneumonia after converting odds ratios to risk ratios.

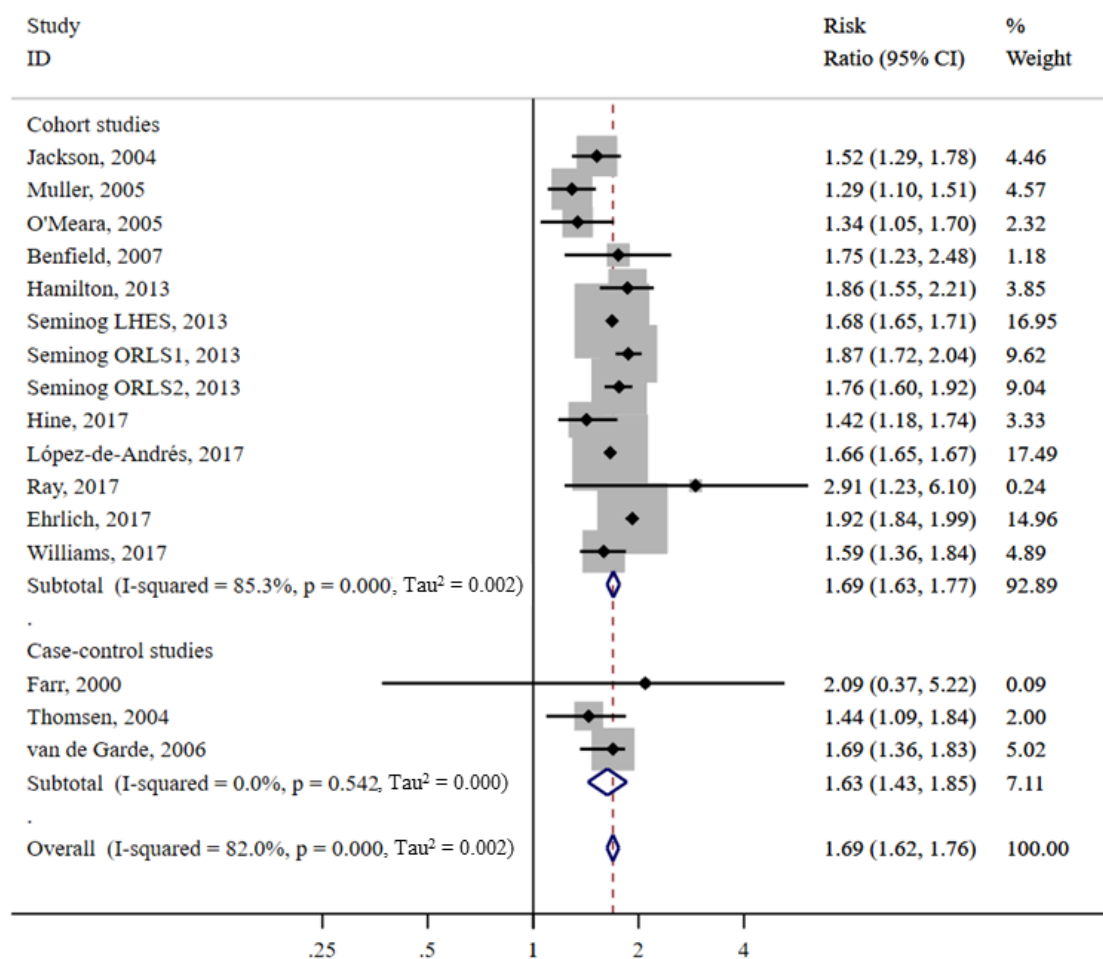

Abbreviations: LHES=Linked English Hospital, ORLS=Oxford Record Linkage Study. The 95% prediction intervals were 1.50, 1.91 for cohort studies, 1.39, 1.91 for case-control studies, and 1.50, 1.91 overall.
