# Supplementary material for: Type 2 diabetes mellitus and risk of community-acquired pneumonia: a systematic review and meta-analysis of observational studies
Source: PubMed Central journal article supplement — CMAJ Open. 2021 Jan 25;9(1):E62–70. doi: 10.9778/cmajo.20200013 (PMC7843079; doi:10.9778/cmajo.20200013), 2021-01-25
Supplement: supp_9.1.E62_2020-0013-MOOSE-checklist.pdf [file supp_9.1.E62_2020-0013-MOOSE-checklist.pdf]

## Type 2 Diabetes Mellitus and Risk of Community-acquired Pneumonia: A Systematic Review and Meta-analysis of Observational Studies

### MOOSE Guidelines for Systematic Reviews of Observational Studies checklist

| Item                                                                                                                                                 | Page           |
|------------------------------------------------------------------------------------------------------------------------------------------------------|----------------|
| <b>Title:</b>                                                                                                                                        |                |
| Identify the study as a meta-analysis (or systematic review)                                                                                         | 1              |
| <b>Abstract:</b>                                                                                                                                     |                |
| Use the journal's structured format                                                                                                                  | 3              |
| <b>Introduction:</b>                                                                                                                                 |                |
| The clinical problem                                                                                                                                 | 4              |
| The hypothesis                                                                                                                                       | 4              |
| A statement of objectives that includes the study population, the condition of interest, the exposure or intervention, and the outcome(s) considered | 4              |
| <b>Sources:</b>                                                                                                                                      |                |
| Qualifications of searchers (eg, librarians and investigators)                                                                                       | 1 and 5        |
| Search strategy, including time period included in the synthesis and keywords                                                                        | 5<br>e-Table 2 |
| Effort to include all available studies, including contact with authors                                                                              | 5-6            |
| Databases and registries searched                                                                                                                    | 5              |
| Search software used, name and version, including special features used (eg, explosion)                                                              | 5<br>e-Table 2 |
| Use of hand searching (eg, reference lists of obtained articles)                                                                                     | 5              |
| List of citations located and those excluded, including justification                                                                                | Figure 1       |
| Method of addressing articles published in languages other than English                                                                              | 5              |
| Method of handling abstracts and unpublished studies                                                                                                 | 6              |
| Description of any contact with authors                                                                                                              | 6              |
| <b>Study Selection:</b>                                                                                                                              |                |
| Types of study designs considered                                                                                                                    | 6              |
| Relevance or appropriateness of studies gathered for assessing the hypothesis to be tested                                                           | 6              |
| Rationale for the selection and coding of data (eg, sound clinical principles or convenience)                                                        | 6-7            |

|                                                                                                                                                                                                                                                               |                                        |
|---------------------------------------------------------------------------------------------------------------------------------------------------------------------------------------------------------------------------------------------------------------|----------------------------------------|
| Documentation of how data were classified and coded (eg, multiple raters, blinding, and interrater reliability)                                                                                                                                               | 6-7                                    |
| Assessment of confounding (eg, comparability of cases and controls in studies where appropriate)                                                                                                                                                              | 6-7                                    |
| Assessment of study quality, including blinding of quality assessors; stratification or regression on possible predictors of study results                                                                                                                    | 7                                      |
| Assessment of heterogeneity                                                                                                                                                                                                                                   | 6-7                                    |
| Statistical methods (eg, complete description of fixed or random effects models, justification of whether the chosen models account for predictors of study results, dose-response models, or cumulative meta-analysis) in sufficient detail to be replicated | 7-8                                    |
| <b>Results:</b>                                                                                                                                                                                                                                               |                                        |
| A graph summarizing individual study estimates and the overall estimate                                                                                                                                                                                       | Figure 2                               |
| A table giving descriptive information for each included study                                                                                                                                                                                                | Table 1, Table 2, e-Table 3, e-Table 4 |
| Results of sensitivity testing (eg, subgroup analysis)                                                                                                                                                                                                        | e-Table 5<br>e-Figures 1 - 7           |
| Indication of statistical uncertainty of findings                                                                                                                                                                                                             | All figures and tables                 |
| <b>Discussion:</b>                                                                                                                                                                                                                                            |                                        |
| Strengths and weaknesses                                                                                                                                                                                                                                      | 13-14                                  |
| Potential biases in the review process (eg, publication bias)                                                                                                                                                                                                 | 13-14                                  |
| Justification for exclusion (eg, exclusion of non-English-language citations)                                                                                                                                                                                 | 14                                     |
| Assessment of quality of included studies                                                                                                                                                                                                                     | 9, 10, 13, 14                          |
| Consideration of alternative explanations for observed results                                                                                                                                                                                                | 12-13                                  |
| Generalization of the conclusions (ie, appropriate for the data presented and within the domain of the literature review)                                                                                                                                     | 15                                     |
| Guidelines for future research                                                                                                                                                                                                                                | 15                                     |
| Disclosure of funding source                                                                                                                                                                                                                                  | 2                                      |
